# Supplementary material for: Phosphorylation by Cdk1 Increases the Binding of Eg5 to Microtubules In Vitro and in Xenopus Egg Extract Spindles
Source: PubMed Central journal article supplement (PMC2592692; doi:10.1371/journal.pone.0003936), 2008-12-15
Supplement: pone.0003936.s002.pdf [file pone.0003936.s002.pdf]

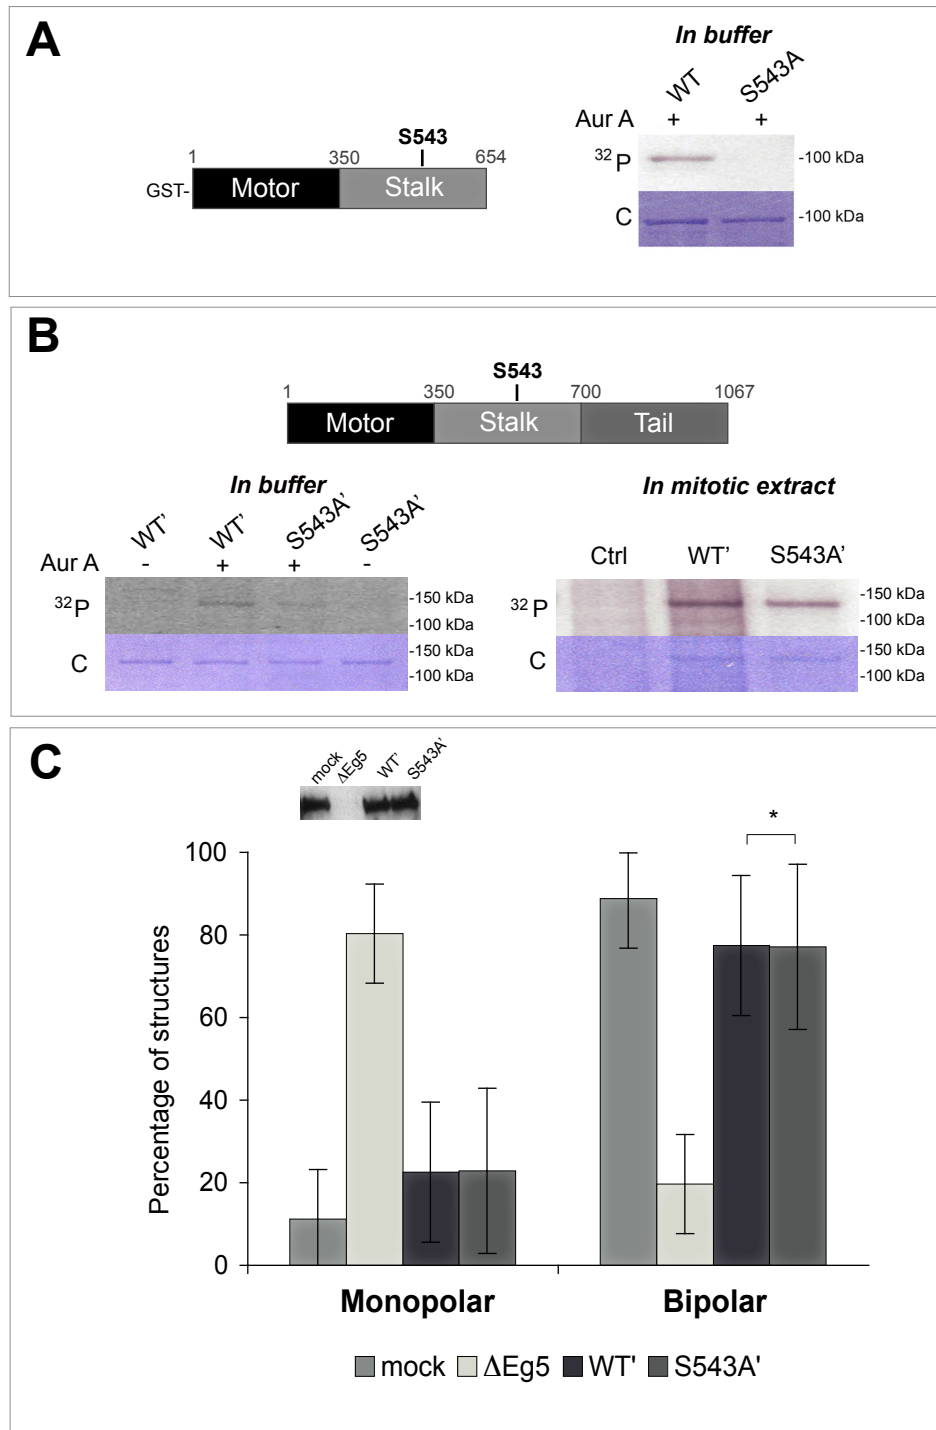

**Figure S1**
